# Supplementary material for: Mobile phone use and risk of brain tumours: a systematic review of association between study quality, source of funding, and research outcomes
Source: Springer Nature journal article supplement (doi:10.1007/s10072-017-2850-8), 2017-02-17
Supplement: 10072_2017_2850_MOESM1_ESM.doc [file 10072_2017_2850_MOESM1_ESM.doc]

**SUPPLEMENTAY APPENDIX**

**SUPPLEMENTARY Appendix I – METHODS**

a.Selection of Relevant Studies

b.Data Collection

## c.Assessment of Methodological Quality

## d.Statistical Analyses

## 1.Main and Subgroup Analyses

## 2.Case Control Studies Meta-analysis Interpretation

**SUPPLEMENTARY Appendix II – RESULTS**

a. Funding of Interphone Studies

**SUPPLEMENTARY Appendic III –DISCUSSION**

a.Overall assessment using Bradford-Hill’s criteria

**SUPPLEMENTARY Appendix IV - TABLES**

**SUPPLEMENTARY Appendix V - FIGURES**

**SUPPLEMENTARY APPENDIX I : METHODS**

## Ia. Selection of Relevant Studies

Two of the authors (PK, MP) independently evaluated the articles for eligibility based on the predetermined selection criteria. The full publications of titles and abstracts of search results were scanned to obtain any relevant articles,(Figure 1) followed by full paper review. All discrepancies were resolved after rechecking the source papers and further discussion among both authors, and consultation of the co-author (KP) where needed.

## Ib. Data Collection

Relevant data was extracted from the articles about the number of participants, age range of participants, participation rate, country where study was conducted, type of tumour investigated and funding source of the study by two authors (MP,PK). The 22 papers were written by 15 authors. The authors were contacted through email for identifying any inconsistency between their data and the data extracted from their respective papers. The corrected data was sent back for confirmation and the same was confirmed.

**Ic. Assessment of Methodological Quality**

The quality of studies was assessed using the scores proposed by modified Newcastle-Ottawa Quality Assessment Scale (NOS).[1] The modified NOS grading for case-control or cohort study included three criteria’s: (i) selection, total score: 4; (ii) comparability, total score: 2; and (iii) exposure (case-control)/outcome (cohort), total score: 3. A high score out of a total of nine points indicates high methodological quality. In the present analysis, study awarded 7 or more stars has been considered as a high quality study, however, all levels of quality were included in the analysis in a hierarchical approach.

## The quality assessment was done by the two authors (MP, PK) and the disagreements were resolved by discussion. The scores of individual studies have been shown in Supplementary Table IV.

## Id .Statistical Analyses

## 1.Main and Subgroup Analyses

## Case control studies

## Studies included in the meta-analysis fall into five data streams for case control study

## (a) Risk of brain tumour,

## (b) Risk of brain tumour with mobile phone use > = 10 years,

## (c) Risk of gliomas,

## d) Risk of meningiomas,

## (e) Risk of acoustic neuromas.

## Two of these analyses (Risk of brain tumour, Risk of brain tumour with mobile phone use > = 10 years) were further done in four parts:

## All studies

## Government-funded studies (where sources of funding were mainly government agencies)

## Industry-funded studies (where sources of funding were mainly mobile phone industries)

## Mixed-funded studies

## A metaregression analysis was introduced to explore heterogeneity between studies.

## 2. Case Control Studies Metaanalysis Interpretation

I-square statistics was interpreted as suggested in ‘Cochrane Handbook for SystematicReviews of Intervention’ (version 5.1.0) as follows:

- 0% to 40%: might not be important;
- 30% to 60%: may represent moderate heterogeneity;
- 50% to 90%: may represent substantial heterogeneity;
- 75% to 100%: considerable heterogeneity

**SUPPLEMENTARY Appendix II: RESULTS**

**IIa. Funding of Interphone**

The Interphone study was undertaken as a collaborative effort between a numbers of partner institutions, co-ordinated by IARC. [2]

The overall funding assigned to the Interphone study amounts to approx. **19.2 million euros (€).** Of this amount **5.5 million € were contributed by industry sources.**

1. Of these 5.5 million €,

-3.5 million € were contributed by the Mobile Manufacturers' Forum (MMF) and the GSM Association, each contributing half of that amount, through a firewall mechanism provided by the UICC (InternationalUnion against Cancer) to guarantee the independence of the scientists.

- Rest of the 5.5 million € came indirectly to individual centers from mobile phone operators and manufacturers, for example, through taxes and fees collected by government agencies.

- Only 0.5 million € (2.5%) of the overall study costs were provided directly by the industry, in Canada and France, under contracts which preserved the independence of the study.

2. Other funding was provided by the European Commission (3.74 million €) and national and local funding sources (9.9 million € in total) in participating countries.

3. Additional funding for the extension of the research to younger and older age groups was received directly from mobile phone operators in the UK under contracts which preserved the independence of the study.

| **Sno.** | **Funding Source** | **Comments** |
| --- | --- | --- |
| 1 | ‘Quality of Life and Management of Living Resources’ | Contract QLK4-CT-1999901563 |
| 2 | The International Union against Cancer (UICC), | Mobile Manufacturers’ Forum and GSM Association. |
| 3 | International Agency for Research on Cancer (IARC) | Lyon, France |

**SUPPLEMENTARY APPENDIX III : DISCUSSION**

**IIIa.Overall assessment using Bradford-Hill’s criteria**

Applying Bradford-Hill’s criteria [3] to assess causation leads to following consideration:

**Strength**: our meta-analysis shows a statistically significant increased risk of gliomas, particularly after long-term (>10 years) use or after cumulative mobile phone use of more than 1640 hours. In fact, the odds ratio for use of >1640 hours has magnitude of 2.29, which is less than three (the conventional figure to show a ‘strong association’) but it is not realistic to expect mobile phones to triple the risk of gliomas. Given the world-wide exposure of a large population to mobile phones, even a small increase in risk will mean a large population attributable risk.

**Consistency**: our forest plot of high quality studies reveals reasonably close point estimates and over-lapping confidence intervals. I-squared also ranges from 0 to 14%, confirming that if quality of 7 or 8 is taken into consideration, there is consistency of results across the studies.

Sometimes, experts consider that there is inconsistency between the results of Hardell’s studies and INTERPHONE study, but this is because of the difference in the age criterion. When Hardell et al recalculated their results using the age group 30-59 years (same as in the INTERPHONE study) for glioma, then the results turned out to be similar. [[4]]

**Biological gradient**: Biological gradient refers to the presence of a dose-response relationship. Several hypotheses can be formulated to test the dose response relationship.

1. The risk of tumour is more on the side of regular usage (ipsilateral) than on the opposite side (contralateral) of the brain.
2. This risk increases with duration of exposure. For example, the risk with ten years of usage is more than the risk with less than ten years of usage.
3. The risk of tumour is more for the part closer to the ear than for the part remote from it. For example, the risk estimate associated with temporal lobe gliomas is higher than gliomas of other lobes of cerebral hemisphere.
4. The risk increases with dose of exposure [4]

Our analysis supports all of these hypotheses.

Dose response relationship is also seen in terms of higher risk of gliomas on the ipsilateral side compared to the contralateral side. Higher risk of gliomas of temporal lobe as compared to that of other lobes also strengthens the dose response relationship. [5]

Increasing risks with higher dose or duration of exposure reported by Hardell et al strongly supports dose response relationship. OR increased statistically significant for glioma for cumulative use of mobile phones per 100h; OR=1.014, 95% CI=1.008-1.019, and per year of latency; OR=1.056, 95% CI=1.037-1.075. Separate calculations of mobile phone and cordless phone use yielded similar results with statistically significant increasing risks. [5]

**Specificity**: This criterion refers to existence of association of exposure to certain diseases while there is absence of association with others. The degree of specificity may vary depending on the nature of exposure, it biological effects and diseases under consideration.

Finding of positive association between mobile phone use with gliomas and possibly acoustic neuromas along with finding of lack of such a finding with meningiomas in the same set of studies supports the fulfillment of criterion of specificity.

**Biological plausibility**: Mobile phones emit radiofrequency electro-magnetic fields (RF-EMFs). RF-EMFs do not have sufficient energy to directly break chemical bonds like ionizing radiation. However, they may impair DNA-repair mechanisms and introduce epi-genetic changes to DNA. Several studies have shown that RF-EMF increase free radical activity within cells. This is probably caused by Fenton reaction. It should also be noted that possible biological effects might not have linear dose response as indicated in some studies [6] and that the effects are depending on the carrier frequencies. [5], [7]

While these and other mechanisms continue to form subjects of study by biology scientists, there is enough evidence from laboratory to support potential of RF-EMFs to cause brain tumours.

**Temporality**: This criterion refers to the necessity that the cause precedes the effect in time. The finding of OR in those using mobile phones for >10 years clearly supports temporality as those with pre-existing gliomas would not have survived for 10 years. Also, association of ipsilateral acoustic neuroma in Hardell’s studies suggests that the tumour followed rather than preceded mobile phone use. If the tumour had preceded the phone use, then the cases would not have habitually used the ipsilateral side during use of phone.

**Coherence**: Coherence refers to lack of conflicting information as regards cause and effect interpretation for an association between an exposure and disease. In the context of brain tumours, a study using ecological data in 165 of 208 countries found a consistent association between brain and nervous system cancer incidence rates and penetration of rate of mobile phone subscriptions. [4] Incidence of brain tumour in different countries also provides coherent information into the cause and effect of brain tumours and mobile phone use. [5]

**Experimental evidence**: According to Hill, experimental evidence meant decreasing a potentially harmful exposure and demonstrating that the frequency of disease declines. Such evidence is impossible to obtain in the context of mobile phone use and brain tumour. However, some experts consider animal experiments demonstrating the adverse effects of exposure as experimental evidence. As indicted under sub-heading biological plausibility, there is substantial though not conclusive evidence that RM-EMF has an effect on rodent cells.

**Analogy**: Analogy as one of Hill’s criteria refers to examples of similar association between exposure and disease. However, this criterion is at odds with the specificity criterion and therefore is not sine qua non to establish association between mobile phone use and brain tumour.

The data for ipsilateral use and temporal lobe location could not be retrieved from the papers which might be considered as one of the limitation of this metaanalysis.

**Supplementary Appendix IV: DATA TABLES**

Supplementary Table I. Funding Sources of Case-Control Studies

| **Case control Studies** | | |
| --- | --- | --- |
| **S.No** | **Study ID(sorted by year of publication)** | **Funding Source** |
| 1. | Hardell 1999 [8] | Swedish Medical Research Council and Orebro Cancer Fund |
| 2. | Muscat 2000 [9] | Cellular Industry Telecommunications Association via the Wireless Technology Research |
| 3. | Inskip 2001 [10] | US Tax Payers |
| 4. | Auvien 2002 [11] | Finnish mobile phone manufacturers and network providers |
| 5. | Hardell 2002 [12] | Swedish Work Environment Fund, Cancer-ochAllergifonden, Orebro Cancer Fund and Telia. |
| 6. | Warren 2003 [13] | - |
| 7. | Hardell 2005 [14] | Cancer-ochAllergifonden, Cancerhjalpen, Orebro Cancer Fund and Nyekelfonden |
| 8. | Lonn 2005 [15] | Mobile Manufacturer’s Forum, Global System for Mobile Communication Association |
| 9. | Schoemaker 2005 [16] | Mobile Manufacturer’s Forum, Global System for Mobile Communication Association |
| 10. | Hardell 2006 [17] | Cancer-ochAllergifonden, Cancerhjalpen, Orebro Cancer Fund and Nyekelfonden |
| 11. | Schuz 2006 [18] | Mobile Manufacturer’s Forum, Global System for Mobile Communication Association |
| 12. | Takebayashi 2006 [19] | Mobile Manufacturer’s Forum, Global System for Mobile Communication Association |
| 13. | Hours 2007 [20] | Mobile Manufacturer’s Forum, Global System for Mobile Communication Association |
| 14. | Lahkola 2007 [21] | Mobile Manufacturer’s Forum, Global System for Mobile Communication Association |
| 15. | Schlehofer 2007 [22] | Mobile Manufacturer’s Forum, Global System for Mobile Communication Association |
| 16. | Lahkola 2008 [23] | Mobile Manufacturer’s Forum, Global System for Mobile Communication Association |
| 17. | Takebayashi 2008 [24] | Mobile Manufacturer’s Forum, Global System for Mobile Communication Association |
| 18. | Hardell 2010 [25] | Cancer-ochAllergifonden, Cancerhjalpen, Fondkistan and Orebro University Hospital Cancer Fund |
| 19. | Interphone study group 2010*[26] | Mobile Manufacturer’s Forum, Global System for Mobile Communication Association |
| 20. | Interphone Study group 2011*[27] | Mobile Manufacturer’s Forum, Global System for Mobile Communication Association |
| 21. | Aydin D 2011 [28] | The Danish Strategic Research Council, The Swedish Council for Working Life and Social Research ,The Swedish Research Council, The Swedish Childhood Cancer Society ,The Research Council of Norway. |
| 22. | Coureau 2015 [29] | The Fondation de France, the Agence Française de Sécurité Sanitaire de l’Environnement et du Travail, theAssociation pour la Recherche contre le Cancer, the Ligue contre le Cancer, theInstitut National de la Santé Et de la Recherche Médicale  —ATC Environnementet Santé |

*The detailed funding for Interphone studies mentioned in Supplementary Appendix II

**Supplementary Table II. List of Participating Institutions in Interphone Study**

|  | **LIST OF PARTICIPATING INSTITUTIONS**[26], [27] |  |
| --- | --- | --- |
| 1 | **Australia Centre**  -Australian National Health and Medical Research Council  - Bruce Armstrong was supported by a University of Sydney Medical Foundation Program Grant and - Julianne Brown by an Australian Postgraduate Award -Cancer Council NSW and The Cancer Council Victoria | (EME Grant 219129) |
| 2 | **Canada**  -Canadian Institutes of Health Research  - Partial support from the Canadian Wireless Telecommunications Association.  -DrSiemiatycki’s research team was partly funded by the Canada Research Chair programme and by the Guzzo-CRS Chair in Environment and Cancer. -Dr Parent had a salary award from the Fonds de la recherche en sante´ du Que´bec.  -University–industry partnership grant from the Canadian Institutes of Health Research (CIHR). | (project MOP-42525) |
| 3 | **Denmark**  - Danish Cancer Society |  |
| 4 | **Finland**  - The Finnish centre by the Emil Aaltonen Foundation and the Academy of Finland. |  |
| 5 | **France**  - l’Association pour la Recherchesur le Cancer (ARC) (Contrat N85142). - Three network operators (Orange, SFR, Bouygues Te´le´com) | The funds provided by the operators represented 5% of the total cost of the French study and were governed by contracts guaranteeing the complete scientific independence of the investigators |
| 6 | **Germany**  -Mobile Phone Research Program (DeutschesMobilfunk for schungsprogramm) of the German Federal Ministry for the Environment, Nuclear Safety, and Nature Protection  -The Ministry for the Environment and Traffic of the state of Baden Wu¨rttemberg; -the Ministry for the Environment of the state of North Rhine-Westphalia  -The MAIFOR Program (MainzerForschungsforderungsprogramm)of the University of Mainz. |  |
| 7 | **Israel** |  |
| 8 | **Italy** |  |
| 9 | **Japan**  -Ministry of Internal Affairs and Communications of Japan. |  |
| 10 | **New Zealand** -Health Research Council  -Hawkes Bay Medical Research Foundation  -The Wellington Medical Research Foundation  -The Waikato Medical Research Foundation  -The Cancer Society of New Zealand. |  |
| 11 | **Norway** |  |
| 12 | **Sweden**  Swedish Research Council  -The Swedish Cancer Society |  |
| 13 | **Stockholm** |  |
| 14 | **United Kingdom** -the Mobile Telecommunications  -Health and Research (MTHR) program  -The Health and Safety Executive, the Department of Health, the UK Network Operators (O2, Orange, T-Mobile, Vodafone, ‘3’) and the Scottish Executive. The Institute of Cancer Research acknowledges National Health Service (NHS) funding to the NIHR Biomedical Research Centre. |  |

| **Supplementary Table III.** Methodological Quality of Studies Based on the Newcastle-Ottawa Scale for Assessing the Quality Of  Case –Control Studies | Adequate Definition of cases | Representativeness of Patient cases | Selection of Controls | Definition of Controls | Control for  important Factor  Or additional  Factor | Ascertainment Of exposure (blinding) | Same method of Ascertainment for Participants | Nonresponse Rate | **Total**  **Score** |
| --- | --- | --- | --- | --- | --- | --- | --- | --- | --- |
| Auvinen  2002 | 1 | 1 | 1 | 1 | 1 | 0 | 1 | 0 | 6 |
| Aydin  2011 | 1 | 1 | 1 | 0 | 2 | 0 | 1 | 0 | 6 |
| Coureau  2015 | 1 | 1 | 1 | 1 | 2 | 0 | 1 | 0 | 7 |
| Hardell  1999 | 1 | 1 | 1 | 0 | 1 | 1 | 1 | 1 | 7 |
| Hardell  2002 | 1 | 1 | 1 | 0 | 2 | 1 | 1 | 0 | 7 |
| Hardell  2005 | 1 | 1 | 1 | 0 | 2 | 1 | 1 | 0 | 7 |
| Hardell  2006 | 1 | 1 | 1 | 0 | 2 | 1 | 1 | 1 | 8 |
| Hardell  2010 | 1 | 1 | 1 | 1 | 2 | 0 | 1 | 0 | 7 |
| Hours  2007* | 1 | 1 | 1 | 0 | 2 | 0 | 1 | 0 | 6 |
| Inskip  2001 | 1 | 0 | 0 | 1 | 2 | 0 | 1 | 0 | 5 |
| Interphone  2010 | 1 | 1 | 1 | 0 | 2 | 0 | 1 | 0 | 6 |
| Interphone  2011 | 1 | 1 | 1 | 0 | 2 | 0 | 1 | 0 | 6 |
| Lakhola  2007** | 1 | 1 | 1 | 0 | 2 | 0 | 1 | 0 | 6 |
| Lakhola  2008** | 1 | 1 | 1 | 0 | 1 | 0 | 1 | 0 | 5 |
| Lonn 2005** | 1 | 1 | 1 | 0 | 2 | 0 | 1 | 0 | 6 |
| Muscat  2000 | 1 | 0 | 0 | 1 | 2 | 0 | 1 | 0 | 5 |
| Schlehofer 2007* | 1 | 1 | 1 | 0 | 2 | 0 | 1 | 0 | 6 |
| Schoemaker  2005* | 1 | 1 | 1 | 1 | 2 | 0 | 1 | 0 | 7 |
| Schuz  2006 | 1 | 1 | 1 | 0 | 2 | 0 | 1 | 0 | 6 |
| Takebayashi  2006* | 1 | 1 | 1 | 0 | 2 | 0 | 1 | 0 | 6 |
| Takebayashi  2008** | 1 | 1 | 1 | 0 | 2 | 0 | 1 | 0 | 6 |
| Warren  2003 | 1 | 1 | 0 | 1 | 1 | 0 | 1 | 0 | 5 |

*Part of data in Interphone study 2011. Not included while updating the meta-analysis.

** Not included in meta-analysis because already part of data in Interphone study 2010.

**Supplementary Table IV.**  Interphone studies

| **S.No** | **Study Name** | **Country** | **Type of tumour** | **Odds Ratio** |
| --- | --- | --- | --- | --- |
| 1. | Lonn 2005 | Germany | Gliomas | 0.8[0.62-1.0] |
|  |  |  | Meningiomas | 0.7[0.5-0.9] |
| 2. | Schoemaker 2005 | Denmark, Finland, Norway, Sweden , UK | Acoustic Neuromas | 0.9(0.7-1.1) |
| 3. | Takebayashi 2006 | Japan | Acoustic Neuromas | 0.73 (0.43 to 1.23) |
| 4. | Schuz 2006 | Denmark | Gliomas | 0.98(0.74-1.29) |
|  |  |  | Meningiomas | 0.84(0.62-1.13) |
| 5. | Hours 2007 | France | Acoustic Neuromas | 0,92(0.53-1.59) |
|  |  |  | Gliomas | 1.15(0.65-2.05) |
|  |  |  | Meningiomas | 0,74(0.43-1.28) |
| 6. | Lakhola 2007 | Denmark , Finland, Norway , Sweden , UK | Gliomas | 0.78(0.68-0.91) |
| 7. | Schlehofer 2007 | Germany | Acoustic Neuromas | 0.67(0.38-1.19) |
| 8. | Lakhola 2008 | Denmark , Finland, Norway, Sweden, UK | Meningiomas | 0.76(0.65-0.89) |
| 9. | Takebeyashi 2008 | Japan | Gliomas | 1.22 (0.63–2.37) |
|  |  |  | Meningiomas | 0.70 (0.42–1.16) |
| 10. | INTERPHONE 2010 | All 13 countries | Gliomas | 0.81(0.70-0.94) |
|  |  |  | Meningiomas | 0.79(0.68-0.91) |
| 11. | INTERPHONE 2011 | All 13 countries | Acoustic Neuromas | 0.85(0.69-1.04) |

**Supplementary Table V.** Studies included in metaregression (if ever use of mobile phones)

| **S.No.** | **Study** | **Study Quality** | **Funding** | **Odds Ratio** |
| --- | --- | --- | --- | --- |
| 1 | Hardell 2006 | 8 | 2 | 1.64 [1.22, 2.20] |
| 2 | Hardell 1999 | 7 | 2 | 0.98 [0.69, 1.37] |
| 3 | Hardell 2002 | 7 | 2 | 1.01 [ 0.83, 1.24] |
| 4 | Hardell 2005 | 7 | 2 | 1.14 [0.89, 1.45] |
| 5 | Hardell 2010 | 7 | 2 | 1.38 [1.03, 1.85] |
| 6 | Aydin 2011 | 6 | 2 | 1.44 [1.03, 2.01] |
| 7 | Takebayashi 2006 | 6 | 2 | 0.82 [0.52, 1.30] |
| 8 | Takebayashi 2008 | 6 | 2 | 0.85 [0.64, 1.12] |
| 9 | Inskip 2001 | 5 | 2 | 0.80 [0.65, 0.98] |
| 10 | Schoemaker 2005 | 7 | 1 | 0.93 [ 0.79, 1.09] |
| 11 | Schuz 2006 | 6 | 1 | 0.91 [0.75, 1.09] |
| 12 | Schlehofer 2007 | 6 | 1 | 0.66 [0.39, 1.12] |
| 13 | Lonn 2005 | 6 | 1 | 0.96 [0.69, 1.34] |
| 14 | Lakhola 2007 | 6 | 1 | 0.96 [0.85, 1.09] |
| 15 | Hour 2007 | 6 | 1 | 0.92 [0.70, 1.22] |
| 16 | Lakhola 2008 | 5 | 1 | 0.84 [0.73, 0.96] |
| 17 | Auvien 2002 | 6 | 0 | 1.44 [1.03, 2.01] |
| 18 | Muscat 2000 | 5 | 0 | 0.75 [0.52, 1.07] |
| 19 | Warren 2003 | 5 | 0 | 1.16 [0.60, 2.23] |
| 20. | Coureau 2015 | 7 | 2 | 1.00[0.80,1.26] |

Funding – Government – 2,Mixed – 1,Phone Industry – 0

**Supplementary Table VI.** Studies included in metaregression (mobile phones use of 10 years or more)

| **S.NO** | **Study** | **Study Quality** | **Funding** | **Odds Ratio** |
| --- | --- | --- | --- | --- |
|  | Hardell 2006 | 8 | 2 | 2.58 [1.30, 5.15] |
|  | Hardell 2005 | 7 | 2 | 1.22 [0.59, 2.51] |
|  | Hardell 2010 | 7 | 2 | 2.34 [1.43, 3.84] |
|  | Takebayashi 2008 | 6 | 2 | 0.85 [0.65, 1.13] |
|  | Schoemaker 2005 | 7 | 1 | 1.21 [ 0.86, 1.69] |
|  | Schuz 2006 | 6 | 1 | 1.81 [0.93, 3.51] |
|  | Lakhola 2007 | 6 | 1 | 0.53 [0.42, 0.67] |
|  | Hour 2007 | 6 | 1 | 5.08 [0.52, 49.30] |
|  | Lakhola 2008 | 5 | 1 | 1.00 [0.75, 1.33] |
|  | Coureau 2014 | 7 | 2 | 2.18[1.11,4.27] |

Funding – Government – 2,Mixed – 1,Phone Industry – 0

**Supplementary Appendix V : FIGURES**

**Supplementary Figure I. Mobile phones use and risk of brain tumours (Government Funded Studies)**

**Supplementary Figure II. Mobile phones use and risk of brain tumours(Phone Industry funded)**

**Supplementary Figure III. Mobile phones use and risk of brain tumours ( Mixed funded)**

**Supplementary Figure IV. Mobile phones use and risk of brain tumours {more than or equal to 10 years} [Government Funded Studies]**

**Supplementary Figure V. Mobile phones use and risk of brain tumours {more than or equal to 10 years} ( Mixed funding)**

**Supplementary Figure VI. Risk of gliomas**

***** Includes the data of Lonn 2005 (gliomas data only),Hours 2007 (gliomas data only), Lakhola 2007 and Takebayashi 2008

(n): additional study

**Supplementary Figure VII. Risk of meningiomas**

***** Includes the data of Lonn 2005(meningiomas data only), Hours 2007(meningiomas data only), Lakhola 2008 and Takebayashi 2008.

**Supplementary Figure VIII. Risk of acoustic neuromas**


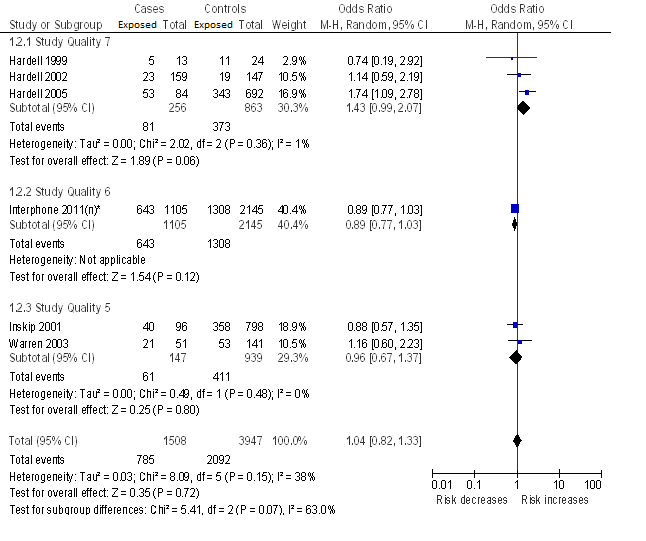


*Includes the data of Schoemaker 2005, Takebayashi 2006, Hours 2007(acoustic neuromas data only) and Schlehofer 2007.

(n): additional study

**Supplementary References**

[1] “George Wells, Shea B, Peterson J, W. The Newcastle - Ottawa Scale (NOS) for assessing the quality of nonrandomised studies in meta - analyses. - Google Search.” [Online]. [2] “Interphone study reports on mobile phone use and brain cancer risk (WHO Press Release N° 200.” 17-May-2010.

[3] A. B. Hill, “The Environment and Disease: Association or Causation?,” *Proc. R. Soc. Med.*, vol. 58, no. 5, pp. 295–300, May 1965.

[4] L. Hardell and M. Carlberg, “Using the Hill viewpoints from 1965 for evaluating strengths of evidence of the risk for brain tumors associated with use of mobile and cordless phones,” *Rev. Environ. Health*, vol. 28, no. 2–3, pp. 97–106, 2013.

[5] L. Hardell, M. Carlberg, and K. Hansson Mild, “Use of mobile phones and cordless phones is associated with increased risk for glioma and acoustic neuroma,” *Pathophysiol. Off. J. Int. Soc. Pathophysiol. ISP*, vol. 20, no. 2, pp. 85–110, Apr. 2013.

[6] H. Nittby, A. Brun, J. Eberhardt, L. Malmgren, B. R. R. Persson, and L. G. Salford, “Increased blood-brain barrier permeability in mammalian brain 7 days after exposure to the radiation from a GSM-900 mobile phone,” *Pathophysiol. Off. J. Int. Soc. Pathophysiol. ISP*, vol. 16, no. 2–3, pp. 103–112, Aug. 2009.

[7] I. Belyaev, E. Markova, and L. Malmgren, “Microwaves from Mobile Phones Inhibit 53BP1 Focus Formation in Human Stem Cells Stronger than in Differentiated Cells: Possible Mechanistic Link to Cancer Risk,” *Environ. Health Perspect.*, Oct. 2009.

[8] L. Hardell, A. Näsman, A. Påhlson, A. Hallquist, and K. Hansson Mild, “Use of cellular telephones and the risk for brain tumours: A case-control study,” *Int. J. Oncol.*, vol. 15, no. 1, pp. 113–116, Jul. 1999.

[9] J. E. Muscat *et al.*, “Handheld cellular telephone use and risk of brain cancer,” *JAMA*, vol. 284, no. 23, pp. 3001–3007, Dec. 2000.

[10] P. D. Inskip *et al.*, “Cellular-telephone use and brain tumors,” *N. Engl. J. Med.*, vol. 344, no. 2, pp. 79–86, Jan. 2001.

[11] A. Auvinen, M. Hietanen, R. Luukkonen, and R.-S. Koskela, “Brain tumors and salivary gland cancers among cellular telephone users,” *Epidemiol. Camb. Mass*, vol. 13, no. 3, pp. 356–359, May 2002.

[12] L. Hardell, A. Hallquist, K. H. Mild, M. Carlberg, A. Påhlson, and A. Lilja, “Cellular and cordless telephones and the risk for brain tumours,” *Eur. J. Cancer Prev. Off. J. Eur. Cancer Prev. Organ. ECP*, vol. 11, no. 4, pp. 377–386, Aug. 2002.

[13] H. G. Warren, A. A. Prevatt, K. A. Daly, and P. J. Antonelli, “Cellular telephone use and risk of intratemporal facial nerve tumor,” *The Laryngoscope*, vol. 113, no. 4, pp. 663–667, Apr. 2003.

[14] L. Hardell, M. Carlberg, and K. Hansson Mild, “Case-control study on cellular and cordless telephones and the risk for acoustic neuroma or meningioma in patients diagnosed 2000-2003,” *Neuroepidemiology*, vol. 25, no. 3, pp. 120–128, 2005.

[15] S. Lönn, A. Ahlbom, P. Hall, M. Feychting, and Swedish Interphone Study Group, “Long-term mobile phone use and brain tumor risk,” *Am. J. Epidemiol.*, vol. 161, no. 6, pp. 526–535, Mar. 2005.

[16] M. J. Schoemaker *et al.*, “Mobile phone use and risk of acoustic neuroma: results of the Interphone case-control study in five North European countries,” *Br. J. Cancer*, vol. 93, no. 7, pp. 842–848, Oct. 2005.

[17] L. Hardell, M. Carlberg, and K. H. Mild, “Case-control study of the association between the use of cellular and cordless telephones and malignant brain tumors diagnosed during 2000-2003,” *Environ. Res.*, vol. 100, no. 2, pp. 232–241, Feb. 2006.

[18] J. Schüz *et al.*, “Cellular phones, cordless phones, and the risks of glioma and meningioma (Interphone Study Group, Germany),” *Am. J. Epidemiol.*, vol. 163, no. 6, pp. 512–520, Mar. 2006.

[19] T. Takebayashi *et al.*, “Mobile phone use and acoustic neuroma risk in Japan,” *Occup. Environ. Med.*, vol. 63, no. 12, pp. 802–807, Dec. 2006.

[20] M. Hours *et al.*, “[Cell Phones and Risk of brain and acoustic nerve tumours: the French INTERPHONE case-control study],” *Rev. Dépidémiologie Santé Publique*, vol. 55, no. 5, pp. 321–332, Oct. 2007.

[21] A. Lahkola *et al.*, “Mobile phone use and risk of glioma in 5 North European countries,” *Int. J. Cancer J. Int. Cancer*, vol. 120, no. 8, pp. 1769–1775, Apr. 2007.

[22] B. Schlehofer *et al.*, “Environmental risk factors for sporadic acoustic neuroma (Interphone Study Group, Germany),” *Eur. J. Cancer Oxf. Engl. 1990*, vol. 43, no. 11, pp. 1741–1747, Jul. 2007.

[23] A. Lahkola *et al.*, “Meningioma and mobile phone use--a collaborative case-control study in five North European countries,” *Int. J. Epidemiol.*, vol. 37, no. 6, pp. 1304–1313, Dec. 2008.

[24] T. Takebayashi *et al.*, “Mobile phone use, exposure to radiofrequency electromagnetic field, and brain tumour: a case-control study,” *Br. J. Cancer*, vol. 98, no. 3, pp. 652–659, Feb. 2008.

[25] L. Hardell, M. Carlberg, and K. Hansson Mild, “Mobile phone use and the risk for malignant brain tumors: a case-control study on deceased cases and controls,” *Neuroepidemiology*, vol. 35, no. 2, pp. 109–114, Aug. 2010.

[26] INTERPHONE Study Group, “Brain tumour risk in relation to mobile telephone use: results of the INTERPHONE international case-control study,” *Int. J. Epidemiol.*, vol. 39, no. 3, pp. 675–694, Jun. 2010.

[27] INTERPHONE Study Group, “Acoustic neuroma risk in relation to mobile telephone use: results of the INTERPHONE international case-control study,” *Cancer Epidemiol.*, vol. 35, no. 5, pp. 453–464, Oct. 2011.

[28] D. Aydin *et al.*, “Mobile phone use and brain tumors in children and adolescents: a multicenter case-control study,” *J. Natl. Cancer Inst.*, vol. 103, no. 16, pp. 1264–1276, Aug. 2011.

[29] G. Coureau, K. Leffondre, A. Gruber, G. Bouvier, and I. Baldi, “Author’s response: re ‘mobile phone use and brain tumours in the CERENAT case-control study,’” *Occup. Environ. Med.*, vol. 72, no. 1, pp. 79–80, Jan. 2015.
